# Supplementary material for: Gold Nanoparticles Synthesized by an Aqueous Extract of Codium tomentosum as Potential Antitumoral Enhancers of Gemcitabine
Source: MDPI journal article supplement (doi:10.3390/md21010020), 2022-12-27
Supplement: s1 [file s1]

## SUPPLEMENTARY INFORMATION

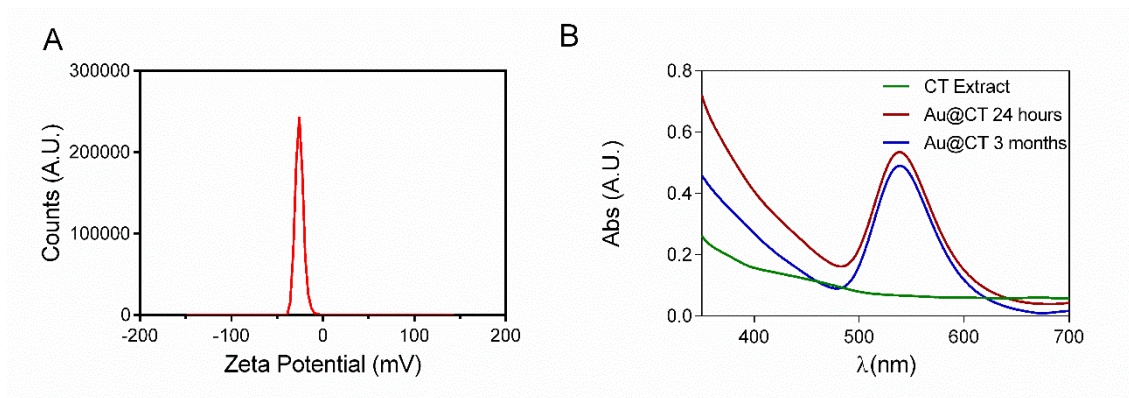

**Figure S1.** (A) Zeta potential distribution of Au@CT. (B) UV-Vis spectra of Au@CT showing the stability of the samples after 3 months.

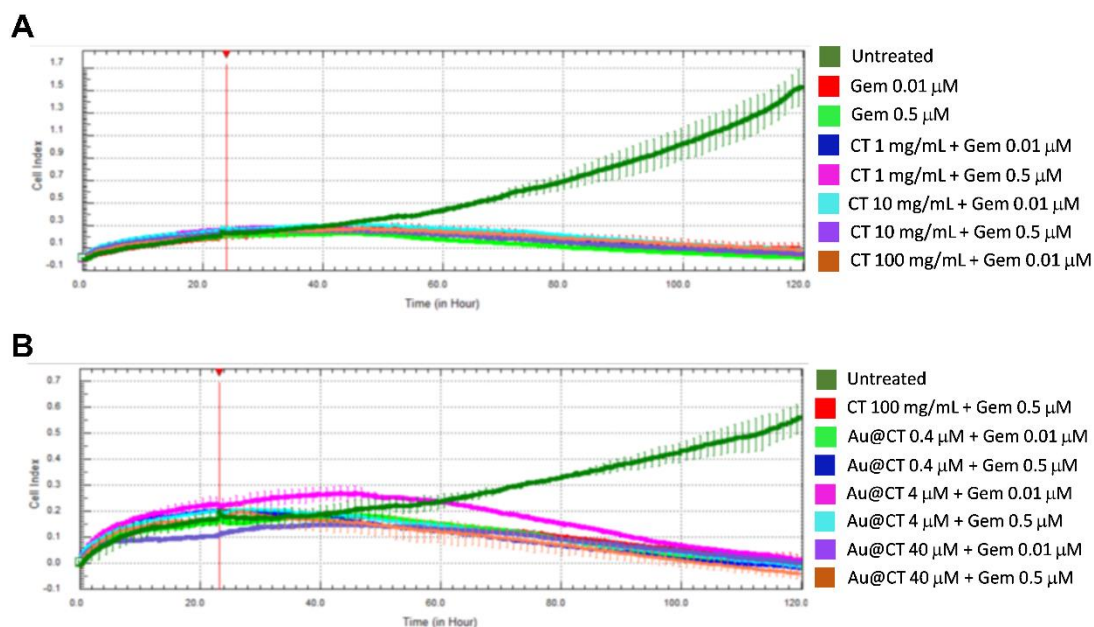

**Figure S2.** Kinetics of the cell viability of BxPC-3 incubated with (B) Au@CT (0.4, 4, 40 μM) and (A) CT extract (1, 10, 100 mg/mL) in combination with gemcitabine (0.01, 0.5 μM). The treatments were added after cell stabilization (vertical red lines).
